# Supplementary material for: SARS-CoV-2 Spike Protein S1-Mediated Endothelial Injury and Pro-Inflammatory State Is Amplified by Dihydrotestosterone and Prevented by Mineralocorticoid Antagonism
Source: MDPI journal article supplement (doi:10.3390/v13112209), 2021-11-03
Supplement: s1 [file s1]

SUPPLEMENT INFORMATION

# **SARS-CoV-2 spike protein S1-mediated endothelial injury and pro-inflammatory state is amplified by dihydrotestosterone and prevented by mineralocorticoid antagonism**

**Nitin Kumar <sup>1,2</sup>, Yu Zuo <sup>3</sup>, Srilakshmi Yalavarthi <sup>3</sup>, Kristina L. Hunker <sup>1,2</sup>, Jason S. Knight <sup>3</sup>, Yogendra Kanthi <sup>1,4</sup>, Andrea T. Obi <sup>5</sup>, and Santhi K. Ganesh <sup>1,2\*</sup>**

1 Department of Internal Medicine, Division of Cardiovascular Medicine, University of Michigan, Ann Arbor, MI, USA

2 Department of Human Genetics, University of Michigan, Ann Arbor, MI, USA

3 Division of Rheumatology, Department of Internal Medicine, University of Michigan, Ann Arbor, MI, USA

4 Laboratory of Vascular Thrombosis & Inflammation, National Heart, Lung and Blood Institute, National Institutes of Health, Bethesda, MD, USA

5 Section of Vascular Surgery, Department of Surgery, University of Michigan, Ann Arbor, MI, USA

\* Correspondence: Santhi K. Ganesh, MD. 1150 West Medical Center Drive, MSRB 3 Room 7220A, Ann Arbor, Michigan 48109-0644, USA. Tel: (734)764-4500; Fax: (734)936-8266; Email: sganesh@umich.edu

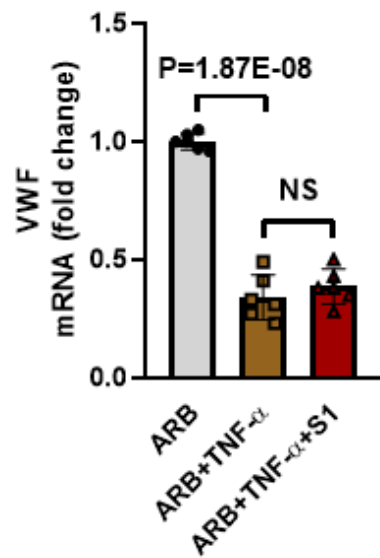

**Figure S1:** In ECs, TNF- $\alpha$  significantly downregulated VWF expression *in vitro*, however co-administration of S1 and TNF- $\alpha$  did not further change VWF expression.

**Supplemental Table S1:** Human qPCR primers.

| <b>Human Gene</b> | <b>Gene description</b>            | <b>Forward Primer (5' &gt; 3')</b> | <b>Reverse Primer (5' &gt; 3')</b> |
|-------------------|------------------------------------|------------------------------------|------------------------------------|
| <i>SELE</i>       | selectin E                         | G TTCCTTCCTGCCAAGTGGT              | GATCTTTCCCGGAAGTGCCA               |
| <i>VCAM1</i>      | vascular cell adhesion molecule 1  | C GAACCCAAACAAAGGCAGAG             | CTCTGGGGGCAACATTGACA               |
| <i>ICAM1</i>      | intercellular adhesion molecule 1  | G GAGCTTCGTGTCCTGTATGG             | CTGGCACATTGGAGTCTGCT               |
| <i>SERPINE1</i>   | plasminogen activator inhibitor 1  | C CTCAGGAAGCCCCTAGAGA              | TGGAGAGGCTCTTGGTCTGAA              |
| <i>PLAT</i>       | plasminogen activator, tissue type | A GTGTGAGCTCTCCGGCTA               | TCCGAATAGAAAGGAGACAAGGC            |
| <i>VWF</i>        | von Willebrand factor              | G GAGATGTTTGCCTACGGCT              | GAGCGTCTCATCACGCTTCA               |
| <i>RPL37</i>      | ribosomal protein L37              | C GCAGATTCAGGCATGGAT               | AGCTGCCCTCTTGGGTTTAGG              |
